# Supplementary material
Source: PubMed Central journal article supplement (PMC4879769)
Supplement: ijmsv13p0365s1.pdf [file ijmsv13p0365s1.pdf]

## Supplementary Figure 1

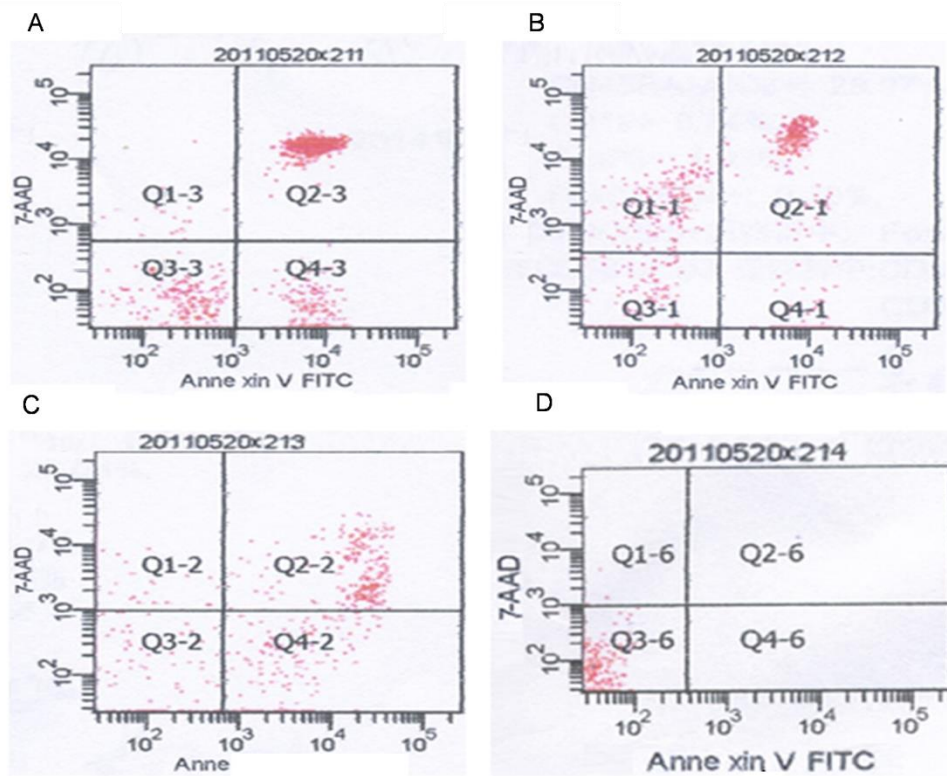

**Apoptosis cell distribution.** **A:** K562-R+EphrinB2-Fc ( $4\mu\text{g/ml}$ ); **B:** K562-R+IgG-Fc ( $0.4\mu\text{g/ml}$ ); **C:** blank control; **D:** negative control.
